# Supplementary material for: Mesenchymal Stromal Cell Bioreactor for Ex Vivo Reprogramming of Human Immune Cells
Source: PubMed Central journal article supplement (PMC7311545; doi:10.1038/s41598-020-67039-w), 2020-06-23

## Supplementary Information

### Mesenchymal Stromal Cell Bioreactor for Ex Vivo Reprogramming of Human Immune Cells

Ashley Allen<sup>1+</sup>, Natalie Vaninov<sup>1+</sup>, Matthew Li<sup>2</sup>, Sunny Nguyen<sup>1</sup>, Peter Igo<sup>1</sup>, Arno W. Tilles<sup>1</sup>, Brian O'Rourke<sup>1</sup>, Brian L. K. Miller<sup>1</sup>, Biju Parekkadan<sup>1,2,3,4</sup>, Rita N. Barcia<sup>1\*</sup>

<sup>1</sup> Sentien Biotechnologies, Inc., Lexington, MA 02421 USA

<sup>2</sup> Department of Surgery, Center for Surgery, Innovation, and Bioengineering, Massachusetts General Hospital, Harvard Medical School and Shriners Hospitals for Children, Boston, Massachusetts 02114, USA

<sup>3</sup> Harvard Stem Cell Institute, Cambridge, Massachusetts 02138, USA

<sup>4</sup> Department of Biomedical Engineering, Rutgers University, Piscataway, New Jersey 08854, USA

<sup>+</sup>Equal contribution

<sup>\*</sup>Corresponding Author

Ashley Allen- ms.ashal@gmail.com

Natalie Vaninov- Natalie.Vaninov@gmail.com

Matthew Li- Li.Matthew14@gmail.com

Sunny Nguyen- Sunny.Nguyen@sentienbiotech.com

Peter Igo- Peter- Igo@sentienbiotech.com

Arno W. Tilles- Arno.Tilles@sentienbiotech.com

Brian O'Rourke- Brian.ORourke@sentienbiotech.com

Brian L.K. Miller- Brian.Miller@sentienbiotech.com

Biju Parekkadan- Biju.Parekkadan@sentienbiotech.com

Rita Barcia- Rita.Barcia@sentienbiotech.com

Figure S1

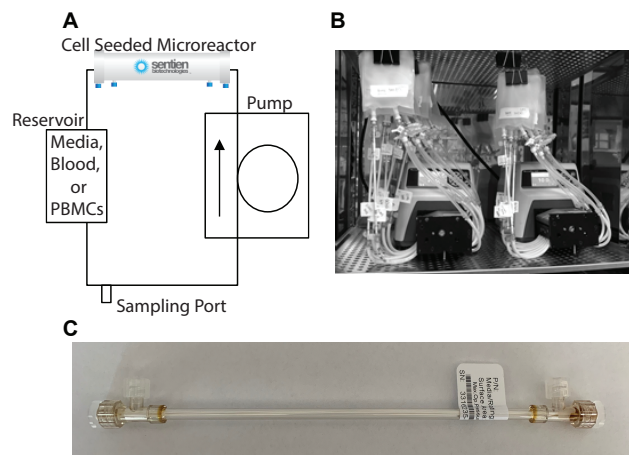

Figure S2

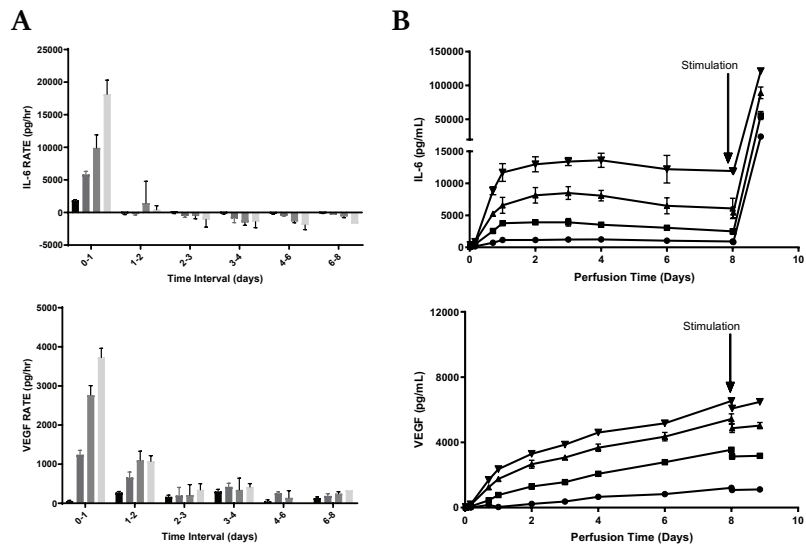

Figure S3

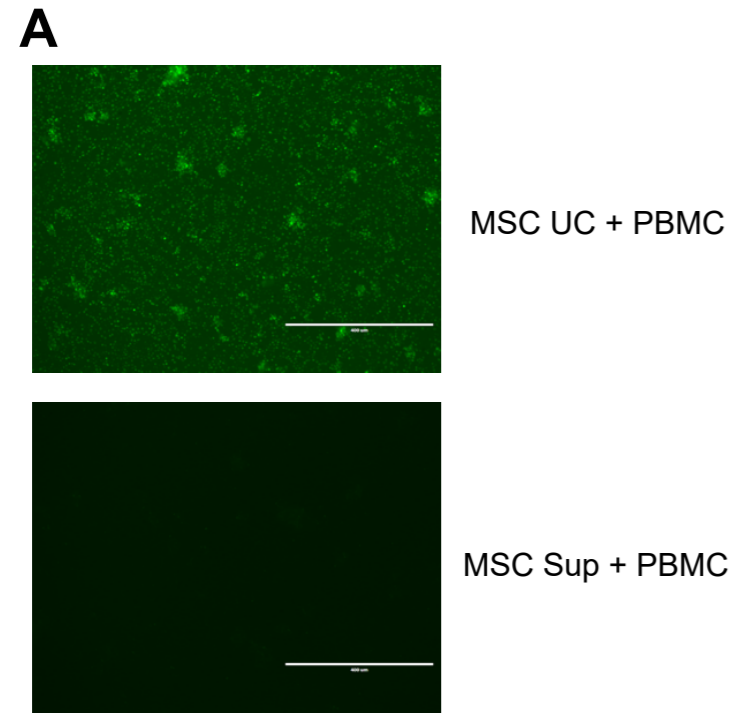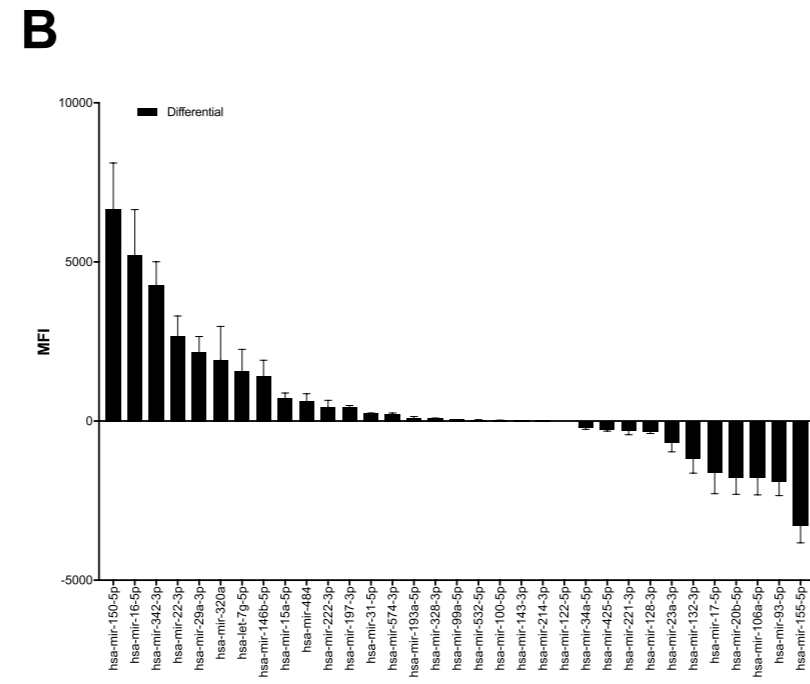

Supplement: 41598_2020_67039_MOESM1_ESM.pdf [file 41598_2020_67039_MOESM1_ESM.pdf]
